# Supplementary material for: Wastewater irrigation impacts on seed germination and seedling growth of rice ( Oryza sativa ), tomato ( Solanum lycopersicum ), and mustard ( Brassica napus ) crops
Source: Royal Society of Chemistry journal article supplement (doi:10.1039/d5ew00324e), 2025-01-01
Supplement: d5ew00324e1.pdf [file d5ew00324e1.pdf]

**Supplementary Table S1:** The chemical properties of collected wastewater

| Properties  | pH         | BOD         | TDS        |
|-------------|------------|-------------|------------|
| Alampur     | 6.47± 0.21 | 125.46± 2.6 | 277.5± 7.8 |
| Khadimnagar | 6.16± 0.56 | 120.42± 3.1 | 286.7± 5.7 |
| Majortilla  | 6.36± 0.32 | 127.36± 2.9 | 273.9± 4.9 |
